1 ***A noncanonical FLT3 gatekeeper mutation disrupts gilteritinib binding and***  
2 ***confers resistance***

3 Sunil K. Joshi<sup>1,2,3</sup>, Setareh Sharzehi<sup>1,3,4</sup>, Janét Pittsenbarger<sup>1,3</sup>, Daniel Bottomly<sup>1,5</sup>, Cristina E.  
4 Tognon<sup>1,3</sup>, Shannon K. McWeeney<sup>1,5</sup>, Brian J. Druker<sup>1,3,4</sup>, Elie Traer<sup>1,3,4</sup>

5  
6 <sup>1</sup>Knight Cancer Institute, Oregon Health & Science University, Portland, OR

7 <sup>2</sup>Department of Physiology & Pharmacology, School of Medicine, Oregon Health & Science  
8 University, Portland, OR

9 <sup>3</sup>Division of Hematology & Medical Oncology, Department of Medicine, Oregon Health & Science  
10 University, Portland, OR

11 <sup>4</sup>Department of Cell, Development, & Cancer Biology, Oregon Health & Science University,  
12 Portland, OR

13 <sup>5</sup>Division of Bioinformatics and Computational Biology, Department of Medical Informatics and  
14 Clinical Epidemiology, Oregon Health & Science University, Portland, OR

15  
16 **§CORRESPONDENCE:** Elie Traer, M.D., Ph.D. ([traere@ohsu.edu](mailto:traere@ohsu.edu)); Oregon Health & Science  
17 University, 3181 SW Sam Jackson Park Road, Mail Code: KR-HEM, Portland, OR 97239; Phone:  
18 503.494.3553; Fax: 503.494.3465

19  
20 **RUNNING TITLE:** *FLT3<sup>N701K</sup> confers gilteritinib resistance*

21  
22 **KEYWORDS:** AML, FLT3, Gilteritinib, Drug Resistance, Resistance point mutation, Tyrosine  
23 Kinase Inhibitor

26 **ABSTRACT:**

27 The recent FDA approval of the FLT3 inhibitor, gilteritinib, for AML represents a major  
28 breakthrough for treatment of FLT3 mutated AML. However, patients only respond to gilteritinib  
29 for 6-7 months due to the emergence of drug resistance. Clinical resistance to gilteritinib is often  
30 associated with expansion of NRAS mutations, and less commonly via gatekeeper mutations in  
31 FLT3, with F691L being the most common. We developed an *in vitro* model that charts the  
32 temporal evolution of resistance to gilteritinib from early microenvironmental-mediated resistance  
33 to late intrinsic resistance mutations. Our model system accurately recapitulates the expansion of  
34 NRAS mutations and the F691L gatekeeper mutations found in AML patients. As part of this  
35 study, we also identified a novel FLT3<sup>N701K</sup> mutation that also appeared to promote resistance to  
36 gilteritinib. Using the Ba/F3 system, we demonstrate that N701K mutations effectively act like a  
37 gatekeeper mutation and block gilteritinib from binding to FLT3, thereby promoting resistance.  
38 Structural modeling of FLT3 reveals how N701K, and other reported gilteritinib resistance  
39 mutations, obstruct the gilteritinib binding pocket on FLT3. Interestingly, FLT3<sup>N701K</sup> does not block  
40 quizartinib binding, suggesting that FLT3<sup>N701K</sup> mutations are more specific for type 1 FLT3  
41 inhibitors (gilteritinib, midostaurin, and crenolanib). Thus, our data suggests that for the FLT3<sup>N701K</sup>  
42 mutation, switching classes of FLT3 inhibitors may restore clinical response. As the use of  
43 gilteritinib expands in the clinic, this information will become critical to define clinical strategies to  
44 manage gilteritinib resistance.

45

46 **INTRODUCTION:**

47 Acute myeloid leukemia (AML) is a genetically heterogenous disease with approximately  
48 20,000 new cases per year in the United States<sup>1, 2</sup>. Patients with AML have a 5-year survival of  
49 <25%, and intense efforts are underway to develop new treatments to improve survival<sup>1</sup>.  
50 Mutations in the FMS-like tyrosine kinase-3 (FLT3) gene are among the most common genomic  
51 aberrations in AML. Internal tandem duplication (ITD) in the juxtamembrane domain of FLT3 are

52 present in approximately 20% of patients with AML. These mutations cause constitutive kinase  
53 activity, and lead to an increased risk of relapse and reduced survival. Another set of mutations  
54 in the tyrosine kinase domain (TKD) of FLT3 occur in 5-10% of AML patients. In contrast to FLT3-  
55 ITD, FLT3 TKD mutations result in less activation of FLT3 and do not increase the risk of relapse<sup>3</sup>.

56 Multiple FLT3 tyrosine kinase inhibitors have been developed and can be separated into two  
57 classes. Type I inhibitors are canonical ATP competitors that bind the ATP binding site of FLT3  
58 in the active conformation and are effective against both ITD and TKD mutations. By contrast,  
59 type II inhibitors bind the hydrophobic region adjacent to the ATP binding domain in the inactive  
60 conformation. Type II inhibitors are effective against FLT3-ITD, but do not inhibit FLT3 TKD  
61 mutations. Quizartinib, a type II inhibitor, has potent activity against FLT3, KIT, and RET. Despite  
62 high response rates as a monotherapy in patients with relapsed/refractory AML, the duration of  
63 response to quizartinib is approximately 4 months, and resistance via FLT3 TKD mutations is  
64 common<sup>4-6</sup>. These mutations occur frequently at the activation loop residue D835 and less  
65 commonly at F691 which represents the “gatekeeper” position in FLT3<sup>4</sup>.

66 Gilteritinib is second-generation inhibitor that targets FLT3 and AXL<sup>7</sup>. As a type I inhibitor, it  
67 is active against TKD mutations that impart quizartinib resistance. It was approved as  
68 monotherapy in relapsed/refractory patients with AML based upon the randomized phase 3  
69 clinical study (ADMIRAL) which compared gilteritinib with chemotherapy<sup>7</sup>. Despite the significant  
70 survival benefit in the gilteritinib arm, monotherapy is limited by the development of resistance,  
71 which typically occurs after 6-7 months. Resistance to gilteritinib most commonly occurs through  
72 acquisition/expansion of NRAS mutations, however a minority of patients with F691L gatekeeper  
73 mutations were also identified<sup>8</sup>. To search for additional resistance mutations to gilteritinib, Tarver  
74 *et al.* used a well-established ENU mutagenesis assay and identified Y693C/N and G697S as  
75 mutations that confer resistance *in vitro*<sup>6</sup>. These mutations appear to function similar to the  
76 gatekeeper mutation by blocking gilteritinib binding to FLT3, but have not been reported in  
77 patients.

## 78 RESULTS & DISCUSSION:

79 To more broadly investigate mechanisms of resistance to gilteritinib, we developed a two-step  
80 model of resistance that recapitulates the role of the marrow microenvironment (**Figure 1A**). In  
81 the first stage of resistance, or early resistance, the FLT3-mutated AML cell lines MOLM14 and  
82 MV4;11 are cultured with exogenous ligands, fibroblast growth factor 2 (FGF2) and FLT3 ligand  
83 (FL), that are normally supplied by marrow stromal cells. These culture conditions allow the cells  
84 to become resistant to gilteritinib without the need for resistance mutations<sup>9</sup>. When ligands are  
85 removed, the cells regain sensitivity to gilteritinib, but ultimately become resistant, which we term  
86 late resistance. At this point, intrinsic resistance mutations were identified in all of the cultures via  
87 whole exome sequencing. Similar to clinical data<sup>7</sup>, we found that the most common mutations are  
88 activating mutations in NRAS<sup>10</sup>. One late resistant culture had an FLT3<sup>F691L</sup> gatekeeper mutation,  
89 and 3 cultures had an FLT3<sup>N701K</sup> mutation, which has not previously been reported (**Figure 1B**).  
90 Given its proximity to F691L (**Figure 1C-D**), we hypothesized that this mutation might also disrupt  
91 gilteritinib binding to FLT3.

92 To determine whether the FLT3<sup>N701K</sup> mutation has oncogenic capacity, we evaluated this  
93 mutation in the Ba/F3 transformation assay. Ba/F3 cells are normally IL-3 dependent but the  
94 presence of certain oncogenes transforms them to grow indefinitely in the absence of IL-3<sup>11</sup>. The  
95 FLT3<sup>N701K</sup> mutation, similar to FLT3<sup>ITD</sup> and FLT3<sup>D835Y</sup>, is an activating mutation and promoted  
96 growth of Ba/F3 cells in the absence of IL-3, whereas the parental, empty vector, FLT3 wild type  
97 (FLT3<sup>WT</sup>), or FLT3<sup>F691L</sup> did not confer IL-3-independent growth (**Figure 1E**).

98 In contrast to Ba/F3 cells expressing FLT3<sup>D835Y</sup>, Ba/F3 cells with FLT3<sup>N701K</sup> were much less  
99 sensitive to gilteritinib with an approximate 8.5-fold increase in IC<sub>50</sub> (**Figure 2A**). To test whether  
100 FLT3<sup>N701K</sup> also promoted resistance to gilteritinib in the presence of FLT3<sup>ITD</sup> mutations (**Figure**  
101 **1B**), we generated FLT3<sup>ITD + N701K</sup> and FLT3<sup>ITD + F691L</sup> double mutants and expressed them in Ba/F3  
102 cells. Concordant with previous studies<sup>4</sup>, the FLT3<sup>ITD + F691L</sup> mutant demonstrated an approximate  
103 11-fold increase in IC<sub>50</sub> to gilteritinib compared to FLT3-ITD alone. FLT3<sup>ITD+N701K</sup> Ba/F3 cells were

104 nearly identical to FLT3<sup>ITD + F691L</sup> cells in their resistance to gilteritinib (**Figure 2B**). As a control,  
105 FLT3<sup>WT</sup> Ba/F3 cells grown with IL-3 were insensitive to gilteritinib at comparable doses.

106 Next, we assessed the impact of FLT3<sup>N701K</sup> mutations on downstream FLT3 signaling  
107 pathways. Ba/F3 cells transformed with FLT3<sup>N701K</sup>, FLT3<sup>ITD</sup>, FLT3<sup>ITD + F691L</sup>, and FLT3<sup>ITD + N701K</sup> all  
108 resulted in phosphorylation of FLT3 (Y589/591) and STAT5 (Y694), AKT (S473), and ERK  
109 (T202/Y204) (**Figure 2C**). However, only FLT3<sup>ITD + N701K</sup> or FLT3<sup>ITD + F691L</sup> showed sustained  
110 phospho-FLT3 with increasing concentrations of gilteritinib (**Figure 2D**), indicating that both of  
111 these mutations prevent gilteritinib inhibition of FLT3, particularly at lower doses. The FLT3 kinase  
112 activity as reflected by FLT3 phosphorylation mirrored the viability assays in **Figure 2B**.

113 Since F691L gatekeeper mutations are known to drive resistance to multiple FLT3 inhibitors<sup>4,</sup>  
114 <sup>8, 12, 13</sup>, we treated FLT3<sup>ITD</sup>, FLT3<sup>ITD + N701K</sup> and FLT3<sup>ITD + F691L</sup> Ba/F3 cells with midostaurin,  
115 crenolanib, and quizartinib. Although FLT3<sup>ITD + F691L</sup> and FLT3<sup>ITD + N701K</sup> were largely insensitive to  
116 type I inhibitors midostaurin and crenolanib, cells with FLT3<sup>ITD + N701K</sup> were notably more sensitive  
117 to the type II inhibitor quizartinib (**Supplemental Figure 1**), suggesting that N701K blocks  
118 gilteritinib binding of type I inhibitors more effectively than type II. This was further apparent from  
119 our modeling of the FLT3<sup>N701K</sup> mutation. While the FLT3<sup>N701K</sup> mutation may sterically interfere with  
120 the binding of gilteritinib, quizartinib binding does not appear to be affected (**Supplemental**  
121 **Figure 2**).

122 Through our studies, we identified the novel FLT3<sup>N701K</sup> mutation in addition to the FLT3<sup>F691L</sup>  
123 gatekeeper mutation. We used the Ba/F3 system to demonstrate that N701K blocks gilteritinib  
124 binding to FLT3, similar to the gatekeeper F691L, and promotes resistance to gilteritinib. Our data  
125 fit nicely with recent data from a mutagenesis screen of Ba/F3 cells with FLT3-ITD that identified  
126 F691L in addition to D698N, G697S, and Y693C/N as mutations that drive resistance to  
127 gilteritinib<sup>6</sup>. Modeling of these mutations indicates that they cause the loss of hydrogen bonding  
128 that accommodates the FLT3 side chain, leading to a steric clash between the tetrahydropyran  
129 ring of gilteritinib and FLT3<sup>6</sup>. Given the proximity of N701K to these mutations, we speculate that

130 the mechanism of resistance to gilteritinib imparted by this mutation is similar (**Supplemental**  
131 **Figure 2**). Importantly, these complementary methods identify a common hotspot for gilteritinib  
132 resistance mutations (**Supplemental Figure 3**). Given the increasing use of gilteritinib in the  
133 clinic, we anticipate that additional resistance mutations will likely be identified in patients. Of note,  
134 the N701K mutation appears to be more resistant to type I inhibitors but retains sensitivity to type  
135 II inhibitors such as quizartinib (**Supplemental Figure 1**), implicating that TKI class switching  
136 could serve as a promising avenue to mitigate development of gilteritinib resistance. The use of  
137 type I FLT3 inhibitors following the acquisition of resistance to type II inhibitors is a well-  
138 established approach to overcome resistance. However, what makes the case with the N701K  
139 mutation interesting is acquired sensitivity to a type II inhibitor following development of resistance  
140 to a type I inhibitor, which is a largely underappreciated concept. This knowledge can be used to  
141 help rationally sequence FLT3 inhibitors upon development of resistance.

142

#### 143 **FIGURE LEGENDS:**

144

145 **Figure 1: FLT3<sup>N701K</sup> is an oncogenic mutation. A.** Model of early and late gilteritinib resistance.  
146 MOLM14 (N = 8) and MV4;11 (N = 8) cultures were continuously treated with gilteritinib and  
147 exogenous microenvironmental ligands (FGF2 or FL, 10 ng/mL) to recapitulate the role of the  
148 marrow microenvironment in the development of early resistance. Following ligand withdrawal,  
149 cultures become transiently sensitive to gilteritinib again, but eventually become resistant with the  
150 outgrowth of NRAS and FLT3 resistance mutations that drive late resistance. **B.** Potential clonal  
151 evolution paths resulting in the outgrowth of the FLT3<sup>N701K</sup> mutation in three cultures. Mutations  
152 were identified by whole exome sequencing and displayed via fishplots<sup>14</sup>. All mutations were  
153 confirmed by Sanger sequencing. **C.** Gene schematic depicts location of the FLT3<sup>N701K</sup> point  
154 mutation relative to FLT3 gatekeeper (F691L) and activating loop (D835Y) mutations. The location  
155 of the following domains is included: immunoglobulin (Ig)-like loops, transmembrane (TM),

156 juxtamembrane (JM), and tyrosine kinase. **D.** Ribbon diagram mapping the location of FLT3<sup>N701K</sup>  
157 onto the crystal structure of the FLT3 kinase domain. Diagram was adapted from PDB 1RJB<sup>3</sup> and  
158 visualized with the UCSF Chimera software<sup>15</sup>. **E.** FLT3<sup>N701K</sup> transforms the murine Ba/F3 pro-B  
159 cell line and enables IL-3 independent growth. No growth was observed in parental Ba/F3 cells  
160 or cells harboring an empty vector (pMX-puro), wildtype (WT) FLT3, or FLT3<sup>F691L</sup>. Total viable  
161 cells are plotted over time and cell growth was measured after the withdrawal of IL-3. This  
162 experiment was repeated at least twice with consistent results.

163 **Figure 2: FLT3<sup>N701K</sup> confers resistance to gilteritinib. A-B.** Ba/F3 cells expressing FLT3<sup>N701K</sup>  
164 and FLT3<sup>ITD+N701K</sup> demonstrate reduced gilteritinib sensitivity. FLT3<sup>D835Y</sup> and FLT3<sup>ITD+F691L</sup> were  
165 used as historical controls. Six replicates of WT and mutant FLT3 Ba/F3 cells were plated with a  
166 dose gradient of gilteritinib (0 – 1000 nM) for 72 hrs. FLT3<sup>WT</sup> cells were plated in media  
167 supplemented with IL-3. Cell viability was determined using a tetrazolamine-based viability assay.  
168 Viability is represented as a percentage of the untreated control. The average mean ± SEM is  
169 shown. **C.** Expression of total and phosphorylated FLT3 is increased in mutant-transformed Ba/F3  
170 cells relative to cells harboring empty vector. All mutants phosphorylate canonical downstream  
171 effectors – STAT5, AKT, and ERK. GAPDH served as a loading control. Prior to lysis, empty  
172 vector cells were grown in IL-3 supplemented media and all lines were starved overnight in 0.1%  
173 BSA RPMI. **D.** FLT3 activity is sustained with mutations in N701K and F691L. Ba/F3 cells  
174 harboring FLT3<sup>ITD</sup>, FLT3<sup>ITD+F701K</sup>, and FLT3<sup>ITD+F691L</sup> were treated with gilteritinib (0 – 400 nM) for  
175 90 minutes and lysed for immunoblot analysis<sup>4, 6</sup>.

176  
177 **ACKNOWLEDGEMENTS:**

178 We are extremely thankful to the Massively Parallel Sequencing Shared Resource for  
179 technical support. We thank Sudarshan Iyer for assistance with UCSF Chimera. This work was  
180 supported by the American Cancer Society (MRSF-17-040-01-LIB) to E.T., the Drug Sensitivity  
181

182 and Resistance Network (DRSN; U54CA224019) to B.J.D, S.K.M, and E.T, and Cancer Center  
183 Support grant (5P30CA069533-22) to B.J.D. Additional funding was provided by the Howard  
184 Hughes Medical Institute, and The Leukemia & Lymphoma Society to E.T. and B.J.D. S.K.J. is  
185 supported by the ARCS Scholar Foundation, The Paul & Daisy Soros Fellowship, and the National  
186 Cancer Institute (F30CA239335). E.T. is supported by grants from the Leukemia & Lymphoma  
187 Society, Hildegard Lamfrom Physician Scientist Award, American Cancer Society, and Cancer  
188 Early Detection Advanced Research Center. C.T., D.B., S.K.M., B.J.D, and E.T. were all  
189 supported by National Cancer Institute (U54CA224019).

190

191 **AUTHOR CONTRIBUTIONS:**

192 **Study supervision:** E. Traer

193 **Conception and design:** S.K. Joshi, E. Traer

194 **Development of methodology:** S.K. Joshi, E. Traer

195 **Acquisition of data:** S.K. Joshi, S. Sharzehi, J. Pittsenbarger

196 **Analysis and interpretation of data (e.g., statistical analysis, biostatistics, computational  
197 analysis):** S.K. Joshi, S. Sharzehi, J. Pittsenbarger, D. Bottomly, C.E. Tognon, S.K. McWeeney,  
198 B.J. Druker, E. Traer

199 **Writing, review, & editing of the manuscript:** S.K. Joshi, J. Pittsenbarger, S. Sharzehi, D.  
200 Bottomly, C.E. Tognon, S.K. McWeeney, B.J. Druker, E. Traer

201 **Development of prioritization framework to assist in rigor and reproducibility:** D. Bottomly,  
202 S.K. McWeeney

203

204 **DISCLOSURES OF POTENTIAL CONFLICTS OF INTEREST:**

205 B.J.D. potential competing interests – SAB: Aileron Therapeutics, Therapy Architects  
206 (ALLCRON), Cepheid, Vivid Biosciences, Celgene, RUNX1 Research Program, Novartis, Gilead  
207 Sciences (inactive), Monojul (inactive); SAB & Stock: Aptose Biosciences, Blueprint Medicines,



208 EnLiven Therapeutics, Iterion Therapeutics, Third Coast Therapeutics, GRAIL (SAB inactive);  
209 Scientific Founder: MolecularMD (inactive, acquired by ICON); Board of Directors & Stock:  
210 Amgen; Vincera Pharma; Board of Directors: Burroughs Wellcome Fund, CureOne; Joint Steering  
211 Committee: Beat AML LLS; Founder: VB Therapeutics; Sponsored Research Agreement:  
212 EnLiven Therapeutics; Clinical Trial Funding: Novartis, Bristol-Myers Squibb, Pfizer; Royalties  
213 from Patent 6958335 (Novartis exclusive license) and OHSU and Dana-Farber Cancer Institute  
214 (one Merck exclusive license and one CytolImage, Inc. exclusive license)  
215 C.E.T. potential competing interests – Research funding from Ignyta (inactive).  
216 E.T. potential competing interests – Advisory Board/Consulting: Abbvie, Agios, Astellas, Daiichi-  
217 Sankyo, Clinical Trial Funding: Janssen, Incyte, LLS BeatAML. Stock options: Notable Labs.  
218 All other authors declare no potential competing interests.

219

220

## 221 REFERENCES:

222

223

- 224 1. De Kouchkovsky, I. and M. Abdul-Hay, '*Acute myeloid leukemia: a comprehensive review*  
225 *and 2016 update*'. *Blood Cancer J*, 2016. **6**(7): p. e441. PMC5030376
- 226 2. Tyner, J.W., C.E. Tognon, D. Bottomly, B. Wilmot, S.E. Kurtz, S.L. Savage, et al.,  
227 *Functional genomic landscape of acute myeloid leukaemia*. *Nature*, 2018. **562**(7728): p.  
228 526-531. PMC6280667
- 229 3. Griffith, J., J. Black, C. Faerman, L. Swenson, M. Wynn, F. Lu, et al., *The structural basis*  
230 *for autoinhibition of FLT3 by the juxtamembrane domain*. *Mol Cell*, 2004. **13**(2): p. 169-78.
- 231 4. Smith, C.C., Q. Wang, C.S. Chin, S. Salerno, L.E. Damon, M.J. Levis, et al., *Validation of*  
232 *ITD mutations in FLT3 as a therapeutic target in human acute myeloid leukaemia*. *Nature*,  
233 2012. **485**(7397): p. 260-3. PMC3390926

- 234 5. Fletcher, L., S.K. Joshi, and E. Traer, *Profile of Quizartinib for the Treatment of Adult*  
235 *Patients with Relapsed/Refractory FLT3-ITD-Positive Acute Myeloid Leukemia: Evidence*  
236 *to Date*. *Cancer Manag Res*, 2020. **12**: p. 151-163. PMC6955578
- 237 6. Tarver, T.C., J.E. Hill, L. Rahmat, A.E. Perl, E. Bahceci, K. Mori, et al., *Gilteritinib is a*  
238 *clinically active FLT3 inhibitor with broad activity against FLT3 kinase domain mutations*.  
239 *Blood Adv*, 2020. **4**(3): p. 514-524. PMC7013266
- 240 7. Perl, A.E., G. Martinelli, J.E. Cortes, A. Neubauer, E. Berman, S. Paolini, et al., *Gilteritinib*  
241 *or Chemotherapy for Relapsed or Refractory FLT3-Mutated AML*. *N Engl J Med*, 2019.  
242 **381**(18): p. 1728-1740.
- 243 8. McMahon, C.M., T. Ferng, J. Canaani, E.S. Wang, J.J.D. Morrisette, D.J. Eastburn, et  
244 al., *Clonal Selection with RAS Pathway Activation Mediates Secondary Clinical*  
245 *Resistance to Selective FLT3 Inhibition in Acute Myeloid Leukemia*. *Cancer Discov*, 2019.  
246 **9**(8): p. 1050-1063.
- 247 9. Traer, E., J. Martinez, N. Javidi-Sharifi, A. Agarwal, J. Dunlap, I. English, et al., *FGF2 from*  
248 *Marrow Microenvironment Promotes Resistance to FLT3 Inhibitors in Acute Myeloid*  
249 *Leukemia*. *Cancer Res*, 2016. **76**(22): p. 6471-6482. PMC5290120
- 250 10. Joshi, S., Traer, Elie, *The AML Microenvironment Catalyzes a Step-Wise Evolution to*  
251 *Gilteritinib Resistance*, in *Cancer Cell*. 2021.
- 252 11. Warmuth, M., S. Kim, X.J. Gu, G. Xia, and F. Adrian, *Ba/F3 cells and their use in kinase*  
253 *drug discovery*. *Curr Opin Oncol*, 2007. **19**(1): p. 55-60.
- 254 12. Smith, C.C., C. Zhang, K.C. Lin, E.A. Lasater, Y. Zhang, E. Massi, et al., *Characterizing*  
255 *and Overriding the Structural Mechanism of the Quizartinib-Resistant FLT3 "Gatekeeper"*  
256 *F691L Mutation with PLX3397*. *Cancer Discov*, 2015. **5**(6): p. 668-79. PMC4522415
- 257 13. Zhang, H., S. Savage, A.R. Schultz, D. Bottomly, L. White, E. Segerdell, et al., *Clinical*  
258 *resistance to crenolanib in acute myeloid leukemia due to diverse molecular mechanisms*.  
259 *Nat Commun*, 2019. **10**(1): p. 244. PMC6335421

- 260 14. Miller, C.A., J. McMichael, H.X. Dang, C.A. Maher, L. Ding, T.J. Ley, et al., *Visualizing*  
261 *tumor evolution with the fishplot package for R*. BMC Genomics, 2016. **17**(1): p. 880.  
262 PMC5100182
- 263 15. Pettersen, E.F., T.D. Goddard, C.C. Huang, G.S. Couch, D.M. Greenblatt, E.C. Meng, et  
264 al., *UCSF Chimera--a visualization system for exploratory research and analysis*. J  
265 Comput Chem, 2004. **25**(13): p. 1605-12.  
266

**A**

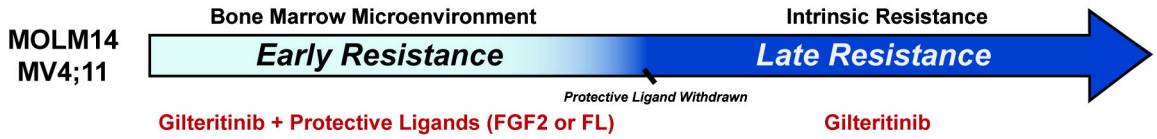

**B**

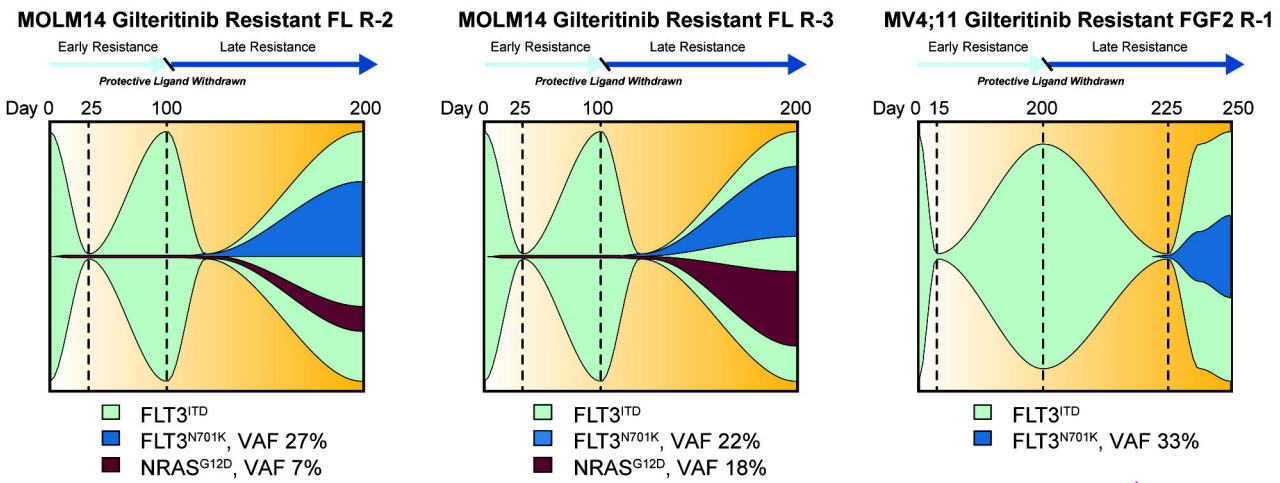

**C**

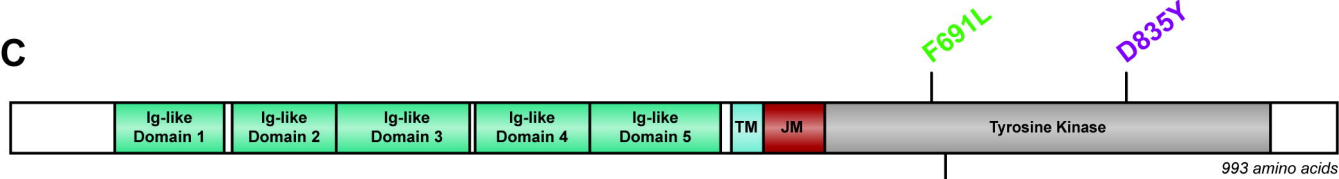

**D**

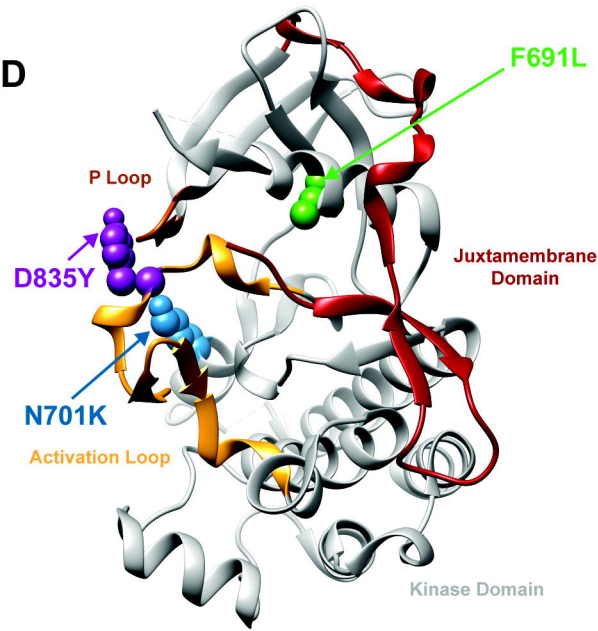

**E**

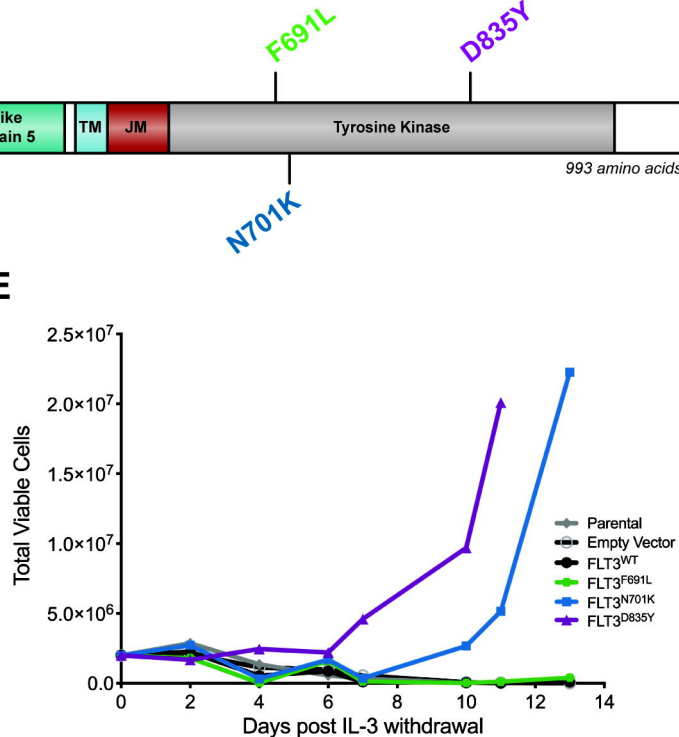



A

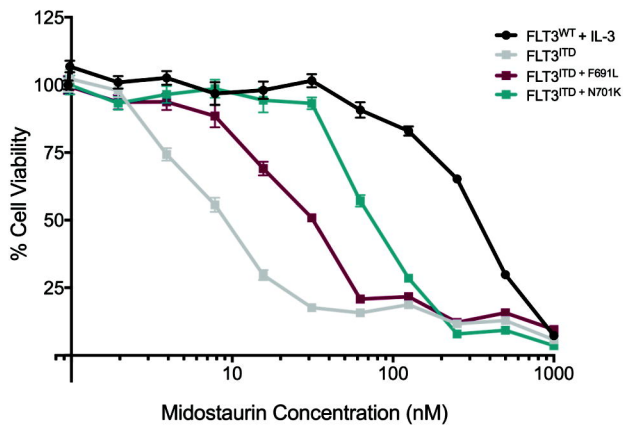

B

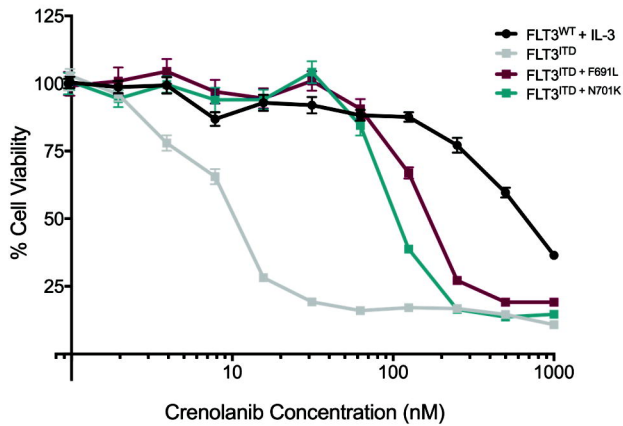

C

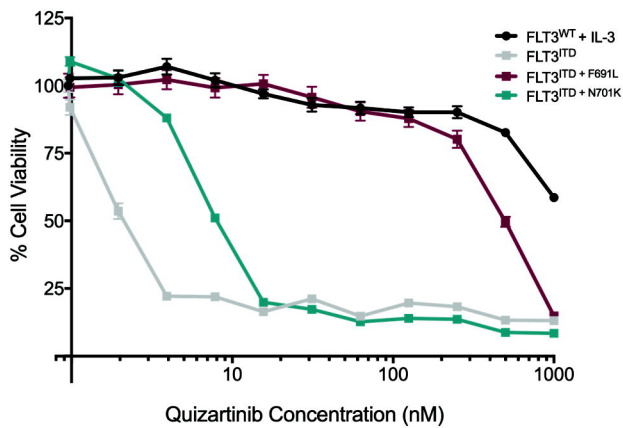

A

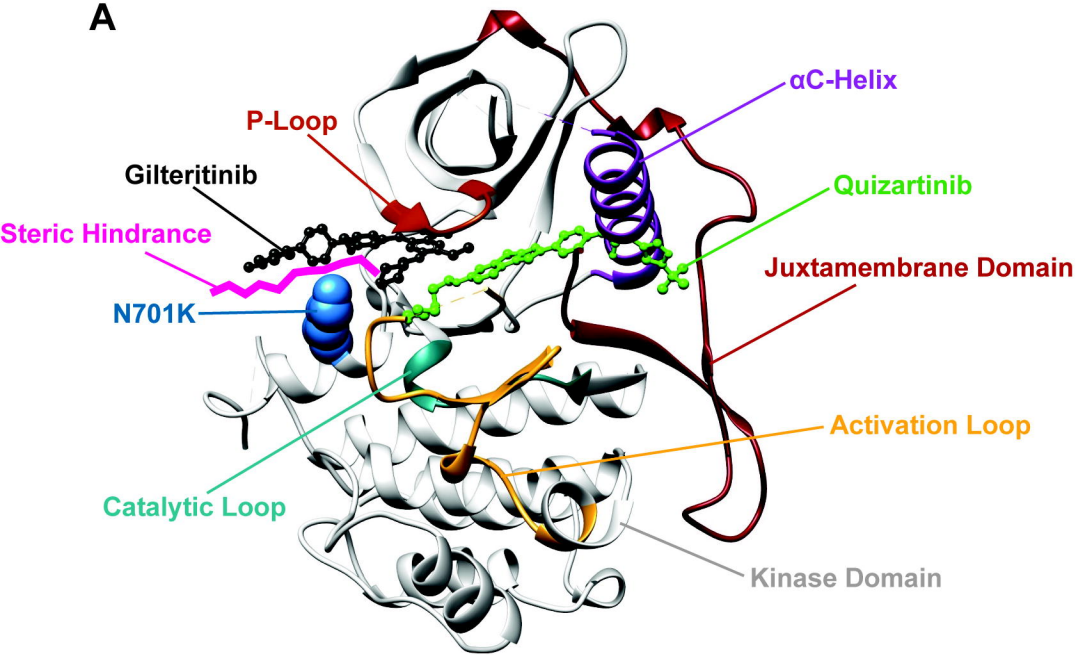

B

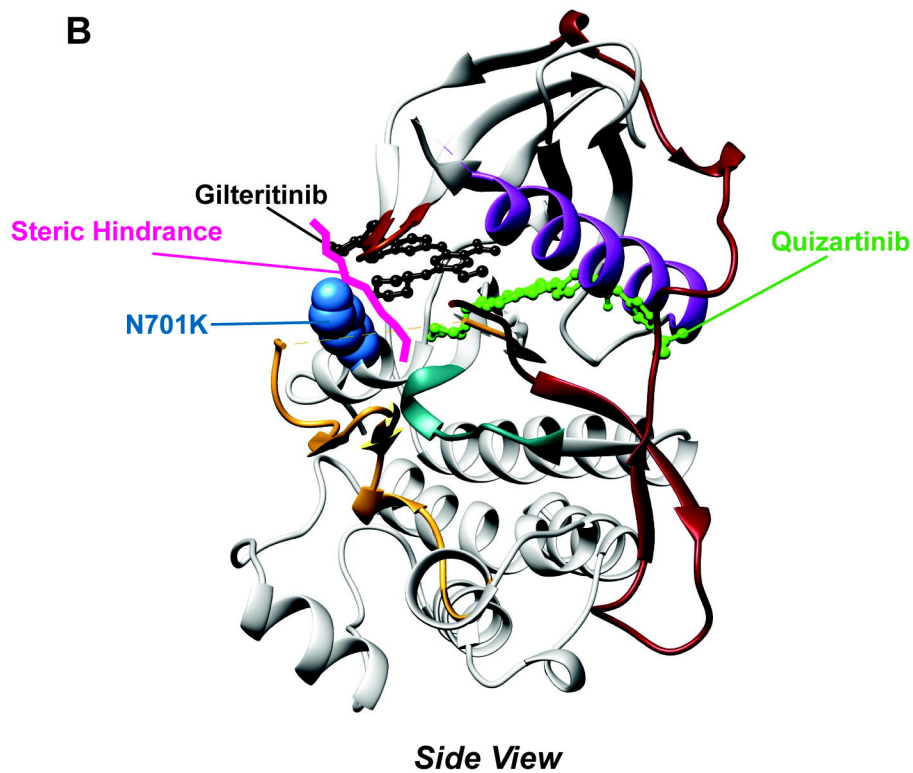

A

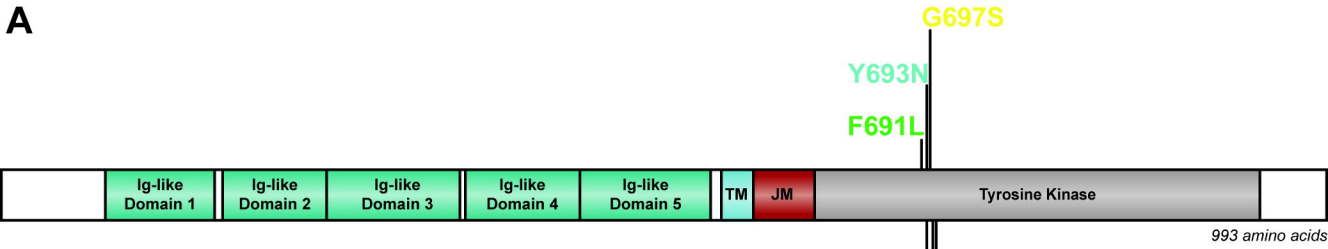

B

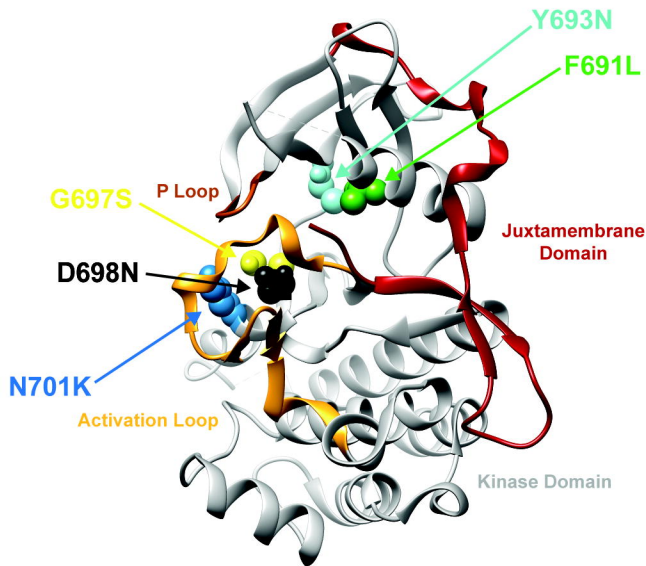

C

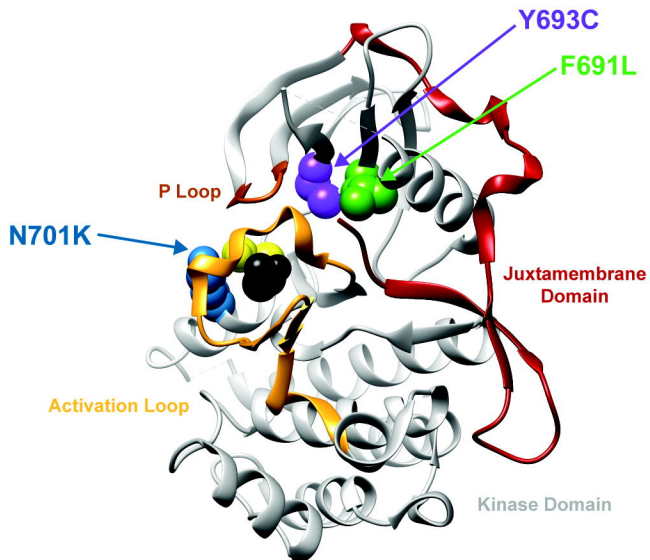

Source: https://www.biorxiv.org/content/biorxiv/early/2021/01/28/2021.01.27.428336.full.pdf
